# Supplementary material for: Short linear motifs in intrinsically disordered regions modulate HOG signaling capacity
Source: PubMed Central journal article supplement (PMC6029073; doi:10.1186/s12918-018-0597-3), 2018-07-03
Supplement: 12918_2018_597_MOESM1_ESM.pdf [file 12918_2018_597_MOESM1_ESM.pdf]

**Table S1:** Predicted short linear motifs (pSLiMs) in the Hypotonic stress and canonical Wnt signaling pathways.

**A.** Signaling components of the Hypotonic stress pathway in *S.cerevisiae* identified from KEGG, with 36 SLiMs predicted in 11 Hypotonic stress signaling proteins using PhyloHMM.

| gene_ID | Uniprot_ID | gene_symbol | full name                                           | pSLiM_ID | pSLiM           |
|---------|------------|-------------|-----------------------------------------------------|----------|-----------------|
| 1       | P36027     | Mid2        | Cell wall integrity sensor MID2                     | 1        | SPLG            |
| 2       | P53832     | Wsc2        | Cell wall integrity and stress response component 2 | 2        | TRT             |
| 2       | P53832     | Wsc2        | Cell wall integrity and stress response component 2 | 3        | GAIAGVV         |
| 2       | P53832     | Wsc2        | Cell wall integrity and stress response component 2 | 4        | RF              |
| 2       | P53832     | Wsc2        | Cell wall integrity and stress response component 2 | 5        | SLPD            |
| 2       | P53832     | Wsc2        | Cell wall integrity and stress response component 2 | 6        | IVNPDN          |
| 3       | P38631     | Fks1        | 1,3 beta-glucan synthase component FKS1             | 7        | YGQP            |
| 3       | P38631     | Fks1        | 1,3 beta-glucan synthase component FKS1             | 8        | YYDPN           |
| 3       | P38631     | Fks1        | 1,3 beta-glucan synthase component FKS1             | 9        | NDTG            |
| 3       | P38631     | Fks1        | 1,3 beta-glucan synthase component FKS1             | 10       | TWSTI           |
| 4       | P24583     | Pkc1        | Protein kinase C-like 1                             | 11       | FT              |
| 4       | P24583     | Pkc1        | Protein kinase C-like 1                             | 12       | TLDP            |
| 4       | P24583     | Pkc1        | Protein kinase C-like 1                             | 13       | SPQK            |
| 5       | Q01389     | Bck1        | Serine/threonine-protein kinase BCK1/SLK1/SSP31     | 14       | SS              |
| 5       | Q01389     | Bck1        | Serine/threonine-protein kinase BCK1/SLK1/SSP31     | 15       | ST              |
| 5       | Q01389     | Bck1        | Serine/threonine-protein kinase BCK1/SLK1/SSP31     | 16       | RSTSES          |
| 5       | Q01389     | Bck1        | Serine/threonine-protein kinase BCK1/SLK1/SSP31     | 17       | IP              |
| 5       | Q01389     | Bck1        | Serine/threonine-protein kinase BCK1/SLK1/SSP31     | 18       | KFKR            |
| 5       | Q01389     | Bck1        | Serine/threonine-protein kinase BCK1/SLK1/SSP31     | 19       | YPQTPS          |
| 5       | Q01389     | Bck1        | Serine/threonine-protein kinase BCK1/SLK1/SSP31     | 20       | NYWN            |
| 5       | Q01389     | Bck1        | Serine/threonine-protein kinase BCK1/SLK1/SSP31     | 21       | RSNS            |
| 5       | Q01389     | Bck1        | Serine/threonine-protein kinase BCK1/SLK1/SSP31     | 22       | SSDDIIWS        |
| 6       | P32490     | Mkk1        | MAP kinase kinase MKK1/SSP32                        | 23       | GSS             |
| 6       | P32490     | Mkk1        | MAP kinase kinase MKK1/SSP32                        | 24       | RPAPPS          |
| 6       | P32490     | Mkk1        | MAP kinase kinase MKK1/SSP32                        | 25       | VDQL            |
| 7       | P32491     | Mkk2        | MAP kinase kinase MKK2/SSP33                        | 26       | SS              |
| 7       | P32491     | Mkk2        | MAP kinase kinase MKK2/SSP33                        | 27       | RPVPPP          |
| 8       | P40457     | Mlp2        | Protein MLP2                                        | 28       | PLS             |
| 8       | P40457     | Mlp2        | Protein MLP2                                        | 29       | LE              |
| 9       | Q12224     | Rlm1        | Transcription factor RLM1                           | 30       | SSSSS           |
| 10      | P25302     | Swi4        | Regulatory protein SWI4                             | 31       | NPSPLQLNVFQTPQQ |
| 10      | P25302     | Swi4        | Regulatory protein SWI4                             | 32       | YSATQKPLQFF     |
| 10      | P25302     | Swi4        | Regulatory protein SWI4                             | 33       | GSS             |
| 11      | P09959     | Swi6        | Regulatory protein SWI6                             | 34       | KR              |
| 11      | P09959     | Swi6        | Regulatory protein SWI6                             | 35       | LGSPLKK         |
| 11      | P09959     | Swi6        | Regulatory protein SWI6                             | 36       | HDL             |

**B.** Signaling components of the human canonical Wnt signaling pathway identified from KEGG, with 24 SLiMs predicted in 16 Wnt signaling proteins using SLiMPrints. Periods indicate positions where any amino acid can match.

| gene_ID | Uniprot_ID | gene_symbol | full name                                          | pSLiM_ID | pSLiM      |
|---------|------------|-------------|----------------------------------------------------|----------|------------|
| 1       | O15169     | AXIN1       | Axin-1                                             | 1        | KK         |
| 1       | O15169     | AXIN1       | Axin-1                                             | 2        | L..HV.RV   |
| 2       | Q9Y2T1     | AXIN2       | Axin-2                                             | 3        | LP         |
| 3       | P35222     | CTNNB1      | Catenin beta-1                                     | 4        | R.R.A.FP   |
| 3       | P35222     | CTNNB1      | Catenin beta-1                                     | 5        | W.DTDL     |
| 4       | O14640     | DVL1        | Segment polarity protein dishevelled homolog DVL1  | 6        | G..S..S    |
| 4       | O14640     | DVL1        | Segment polarity protein dishevelled homolog DVL1  | 7        | S..GS      |
| 5       | O14641     | DVL2        | Segment polarity protein dishevelled homolog DVL2  | 8        | S..SF..A.G |
| 5       | O14641     | DVL2        | Segment polarity protein dishevelled homolog DVL2  | 9        | G..RR      |
| 6       | Q92997     | DVL3        | Segment polarity protein dishevelled homolog DVL3  | 10       | S..SG      |
| 7       | Q9UJU2     | LEF1        | Lymphoid enhancer-binding factor 1                 | 11       | I.HPA      |
| 7       | Q9UJU2     | LEF1        | Lymphoid enhancer-binding factor 1                 | 12       | R.PYP      |
| 8       | O75197     | LRP5        | Low-density lipoprotein receptor-related protein 5 | 13       | DR.H..G.S  |
| 9       | O43318     | MAP3K7      | Mitogen-activated protein kinase kinase kinase 7   | 14       | LD..LQP    |
| 10      | Q969G9     | NKD1        | Protein naked cuticle homolog 1                    | 15       | KHK.R.K    |
| 11      | Q969F2     | NKD2        | Protein naked cuticle homolog 2                    | 16       | P..QRHE    |
| 12      | Q9HC62     | SEN2        | Sentrin-specific protease 2                        | 17       | RR         |
| 13      | Q13485     | SMAD4       | Mothers against decapentaplegic homolog 4          | 18       | W.G..T..YT |
| 13      | Q13485     | SMAD4       | Mothers against decapentaplegic homolog 4          | 19       | TIQH.P     |
| 14      | Q9HCS4     | TCF7L1      | Transcription factor 7-like 1                      | 20       | KK.C.Y     |
| 14      | Q9HCS4     | TCF7L1      | Transcription factor 7-like 1                      | 21       | SP         |
| 15      | Q9NQBO     | TCF7L2      | Transcription factor 7-like 2                      | 22       | E.L        |
