# Supplementary material for: Short linear motifs in intrinsically disordered regions modulate HOG signaling capacity
Source: PubMed Central journal article supplement (PMC6029073; doi:10.1186/s12918-018-0597-3), 2018-07-03
Supplement: 12918_2018_597_MOESM2_ESM.pdf [file 12918_2018_597_MOESM2_ESM.pdf]

Table S2

| strain_ID | mutation              | status | P-value KL-divergence difference from wt | multiple testing correction (17 tests) | Median of KL-divergence - between mutant and wild-type | Median of KL-divergence - between mutant and model | Replicates (n) |
|-----------|-----------------------|--------|------------------------------------------|----------------------------------------|--------------------------------------------------------|----------------------------------------------------|----------------|
| YBS117    | Opy2 $\Delta$ 233-45  | known  | 5.72E-05                                 | 0.001                                  | 0.070                                                  | 0.064                                              | 6              |
| YBS146    | Ste20 $\Delta$ 469-80 | known  | 0.955                                    | 1                                      | 0.013                                                  | 0.060                                              | 5              |
| YBS105    | Hot1 $\Delta$ 373-85  | known  | 5.85E-07                                 | 9.95E-06                               | 1.526                                                  | 0.153                                              | 11             |
| YBS92     | Pbs2 $\Delta$ 91-100  | known  | n/d                                      | n/d                                    |                                                        |                                                    |                |
| YBS91     | Wild-type             | na     |                                          |                                        | 0.012                                                  | 0.053                                              | 38             |
| YBS95     | Sho1 $\Delta$ 217-31  | novel  | 0.023                                    | 0.394                                  | 0.018                                                  | 0.055                                              | 7              |
| YBS144    | Ste20 $\Delta$ 66-71  | novel  | 0.925                                    | 1                                      | 0.018                                                  | 0.108                                              | 5              |
| YBS138    | Pbs2 $\Delta$ 249-55  | novel  | 0.532                                    | 1                                      | 0.014                                                  | 0.080                                              | 5              |
| YBS140    | Pbs2 $\Delta$ 281-5   | novel  | 0.116                                    | 1                                      | 0.038                                                  | 0.091                                              | 5              |
| YBS142    | Pbs2 $\Delta$ 292-8   | novel  | 0.191                                    | 1                                      | 0.014                                                  | 0.105                                              | 5              |
| YBS106    | Nup133 $\Delta$ 8-13  | novel  | 0.085                                    | 1                                      | -0.650                                                 | 0.388                                              | 8              |
| YBS94     | Ste50 $\Delta$ 341-6  | novel  | 0.001                                    | 0.016                                  | 0.047                                                  | 0.058                                              | 7              |
| YBS121    | Ste11 $\Delta$ 379-82 | novel  | 2.51E-03                                 | 0.043                                  | 0.125                                                  | 0.080                                              | 7              |
| YBS118    | Pbs2 $\Delta$ 180-8   | novel  | 3.79E-04                                 | 0.006                                  | 0.121                                                  | 0.104                                              | 6              |
| YBS119    | Pbs2 $\Delta$ 269-74  | novel  | 3.33E-05                                 | 0.001                                  | 2.778                                                  | 0.182                                              | 7              |
| YBS120    | Pbs2 $\Delta$ 661-8   | novel  | 1.19E-03                                 | 0.020                                  | 0.050                                                  | 0.046                                              | 7              |
| YBS108    | Sin3 $\Delta$ 541-8   | novel  | 0.002                                    | 0.042                                  | 0.054                                                  | 0.036                                              | 8              |
| YBS148    | Sch9 $\Delta$ 178-89  | novel  | 1.04E-04                                 | 0.002                                  | 0.269                                                  | 0.099                                              | 6              |
